# Supplementary material for: Non-thermal magnetic deicing using two-dimensional chromium telluride
Source: Royal Society of Chemistry journal article supplement (doi:10.1039/d4tc02542c), 2024-01-01
Supplement: d4tc02542c1.pdf [file d4tc02542c1.pdf]

## SUPPORTING INFORMATION

# Non-thermal Magnetic Deicing Using Two-Dimensional Chromium Telluride

*Chinmayee Chowde Gowda<sup>1</sup>, Alexey Kartsev<sup>2,3,4\*</sup>, Nishant Tiwari<sup>5</sup>, Safronov A.A.<sup>3</sup>, Prafull Pandey<sup>6</sup>, Ajit K. Roy<sup>7</sup>, Pulickel M. Ajayan<sup>8</sup>, Douglas S. Galvão<sup>9\*</sup> and Chandra Sekhar Tiwary<sup>1,5</sup>*

<sup>1</sup>School of Nano Science and Technology, Indian Institute of Technology Kharagpur, West Bengal – 721302, India

<sup>2</sup>Computing Center of the Far Eastern Branch of the Russian Academy of Sciences, 680000 Khabarovsk, Russia

<sup>3</sup>MIREA-Russian Technological University, 119454 Moscow, Russia

<sup>4</sup>Peoples' Friendship University of Russia (RUDN University), 6 Miklukho-Maklaya St, Moscow 117198, Russia

<sup>5</sup>Department of Metallurgical and Materials Engineering, Indian Institute of Technology Kharagpur, West Bengal – 721302, India

<sup>6</sup>Materials Engineering, Indian Institute of Technology Gandhinagar, Gujarat – 382055, India

<sup>7</sup>Materials and Manufacturing Directorate, Air Force Research Laboratory, Wright Patterson AFB, Ohio, 45433-7718, USA

<sup>8</sup>Department of Materials Science and NanoEngineering, Rice University, 6100 S Main Street, Houston, TX 77005, USA

<sup>9</sup>Applied Physics Department and Computational Engineering and Sciences, State University of Campinas, Campinas, SP, 13083-970, Brazil

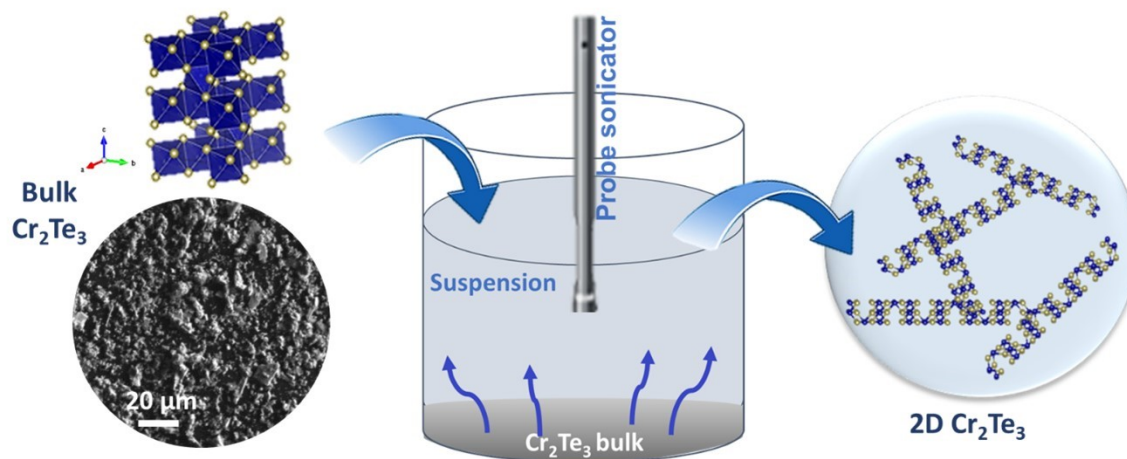

**Figure S1:** Schematic representation of the liquid phase exfoliation technique (inset down: SEM image of bulk  $\text{Cr}_2\text{Te}_3$  crushed sample).

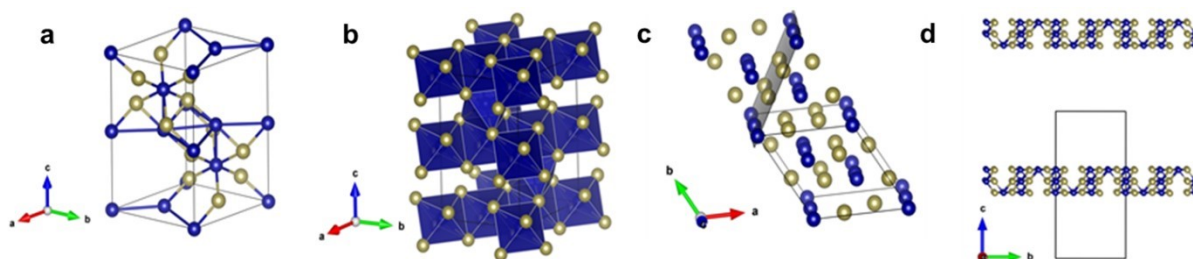

**Figure S2:** Volumetric view of the original structure, (a) Cr atoms are shown in blue, Te atoms in yellow, (b) volumetric view of the original structure in the polyhedron model, (c) plane  $(11\bar{0})$  in the original structure and (d) initial 2D structure.

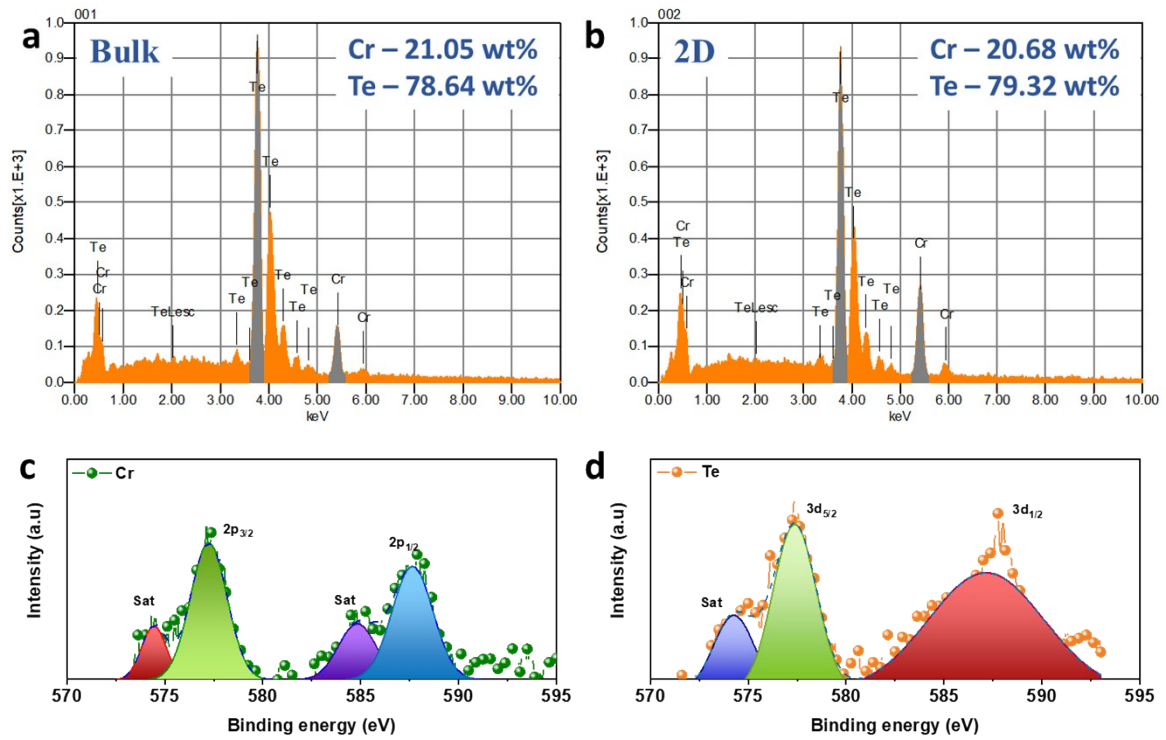

**Figure S3:** Elemental analysis of (a) bulk sample after homogenization, and (b) 2D  $\text{Cr}_2\text{Te}_3$ , (c) XPS survey spectra of  $\text{Cr}_2\text{Te}_3$  (c) Chromium and (d) Tellurium.

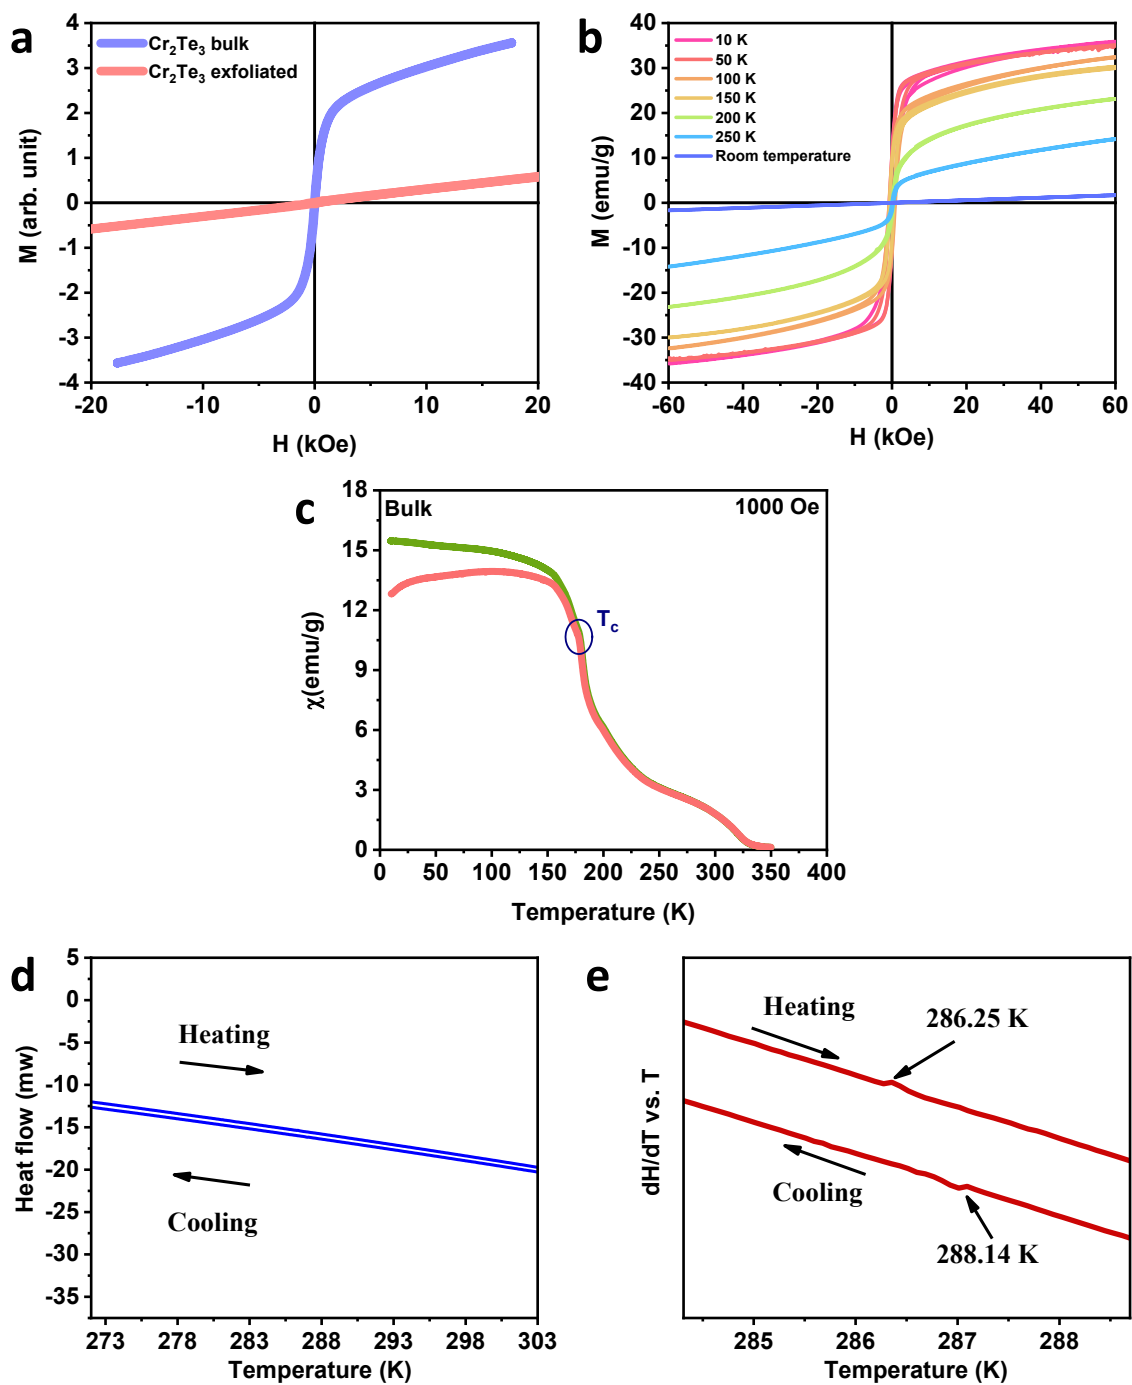

**Figure S4:** Magnetic behavioural studies (a)  $M$ - $H$  loop of bulk and 2D  $\text{Cr}_2\text{Te}_3$  at room temperature, (b)  $M$ - $H$  loop at temperatures ranging from 10 K to 300 K (50 K intervals) and (c) FC-ZFC curves depicting  $T_c$  at 180 K for bulk  $\text{Cr}_2\text{Te}_3$  (d) DSC data showing heating and cooling curves and (e)  $dH/dT$  vs.  $T$  curves.

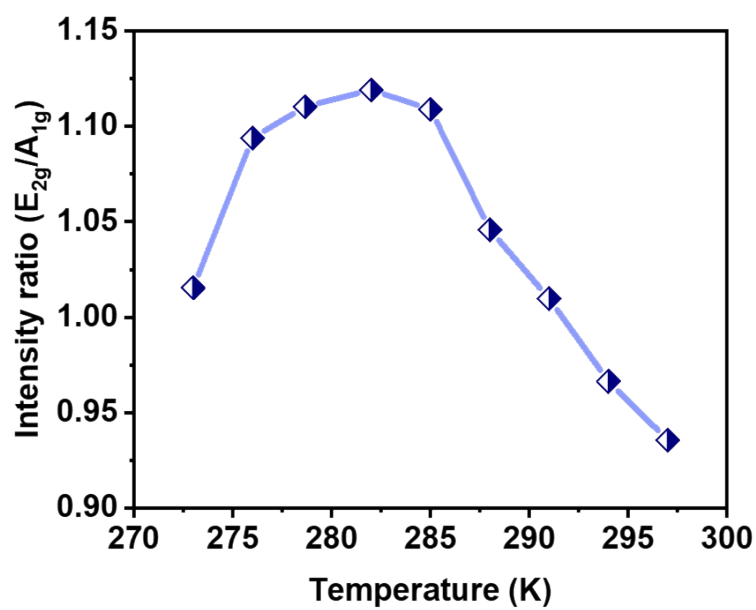

**Figure S5:** Intensity ratio shift of two major Raman bands during heating conditions (273 K to 297 K).

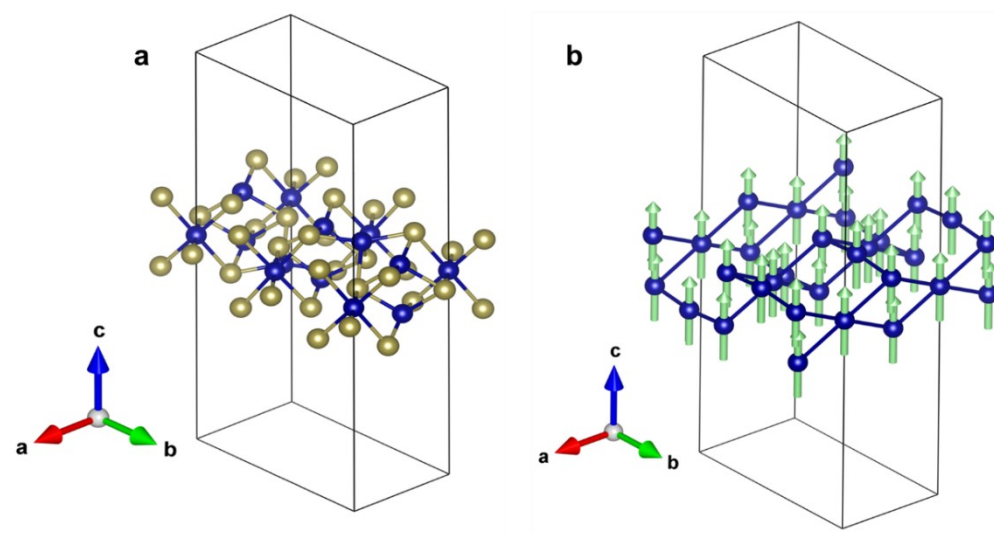

**Figure S6:** (a) Final view of the 2D structure  $Cr_2Te_3$  and (b) magnetic sublattice Cr.

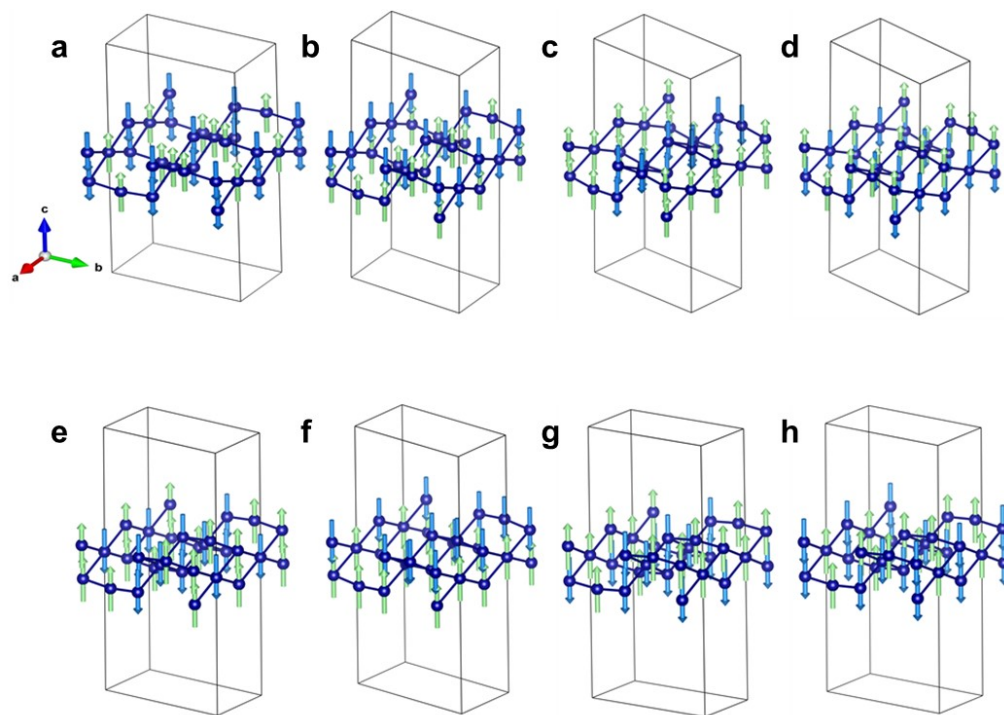

**Figure S7:** Magnetic sublattice Cr of the final system with possible orientations of the spin magnetic moment in the antiferromagnetic structure (a-h).

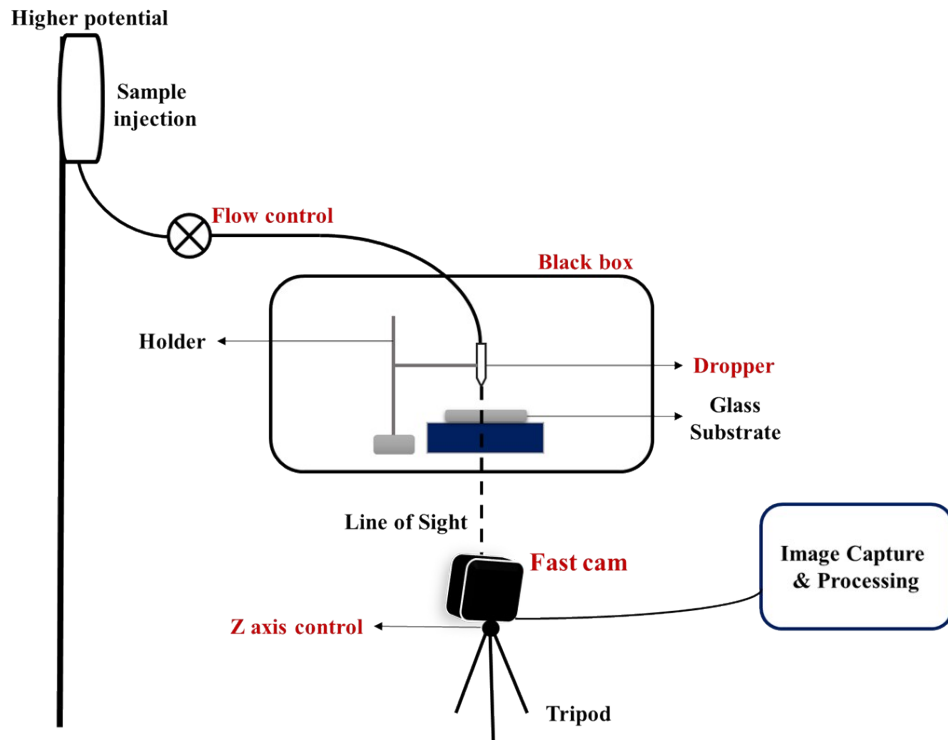

*Figure S8: Schematic diagram of 2D  $\text{Cr}_2\text{Te}_3$  drop on glass substrate for wettability study.*

**High speed camera specifications:**

**Model:** Fastcam Mini UX 50 type 160 K – M – 4G

**Frame rate:** 2000 fps

**Shutter speed:** 1/ frame sec

**Resolution:** 1280 x 1024

**Frame count:** 2180 frame

**Rec duration:** 1.09 sec

**Trigger mode:** Start

**Zoom ratio:** 422 % (Variable)

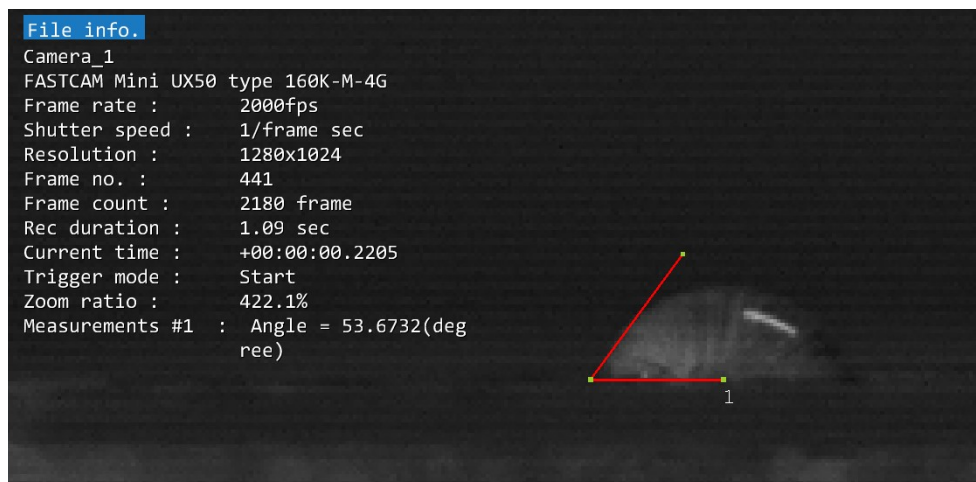

**Figure S9:** Single frame captured during measurement of water contact angle (Bulk  $\text{Cr}_2\text{Te}_3$  in this case) from Photron photo viewer software (PFV4 ( $\times 64$ )).



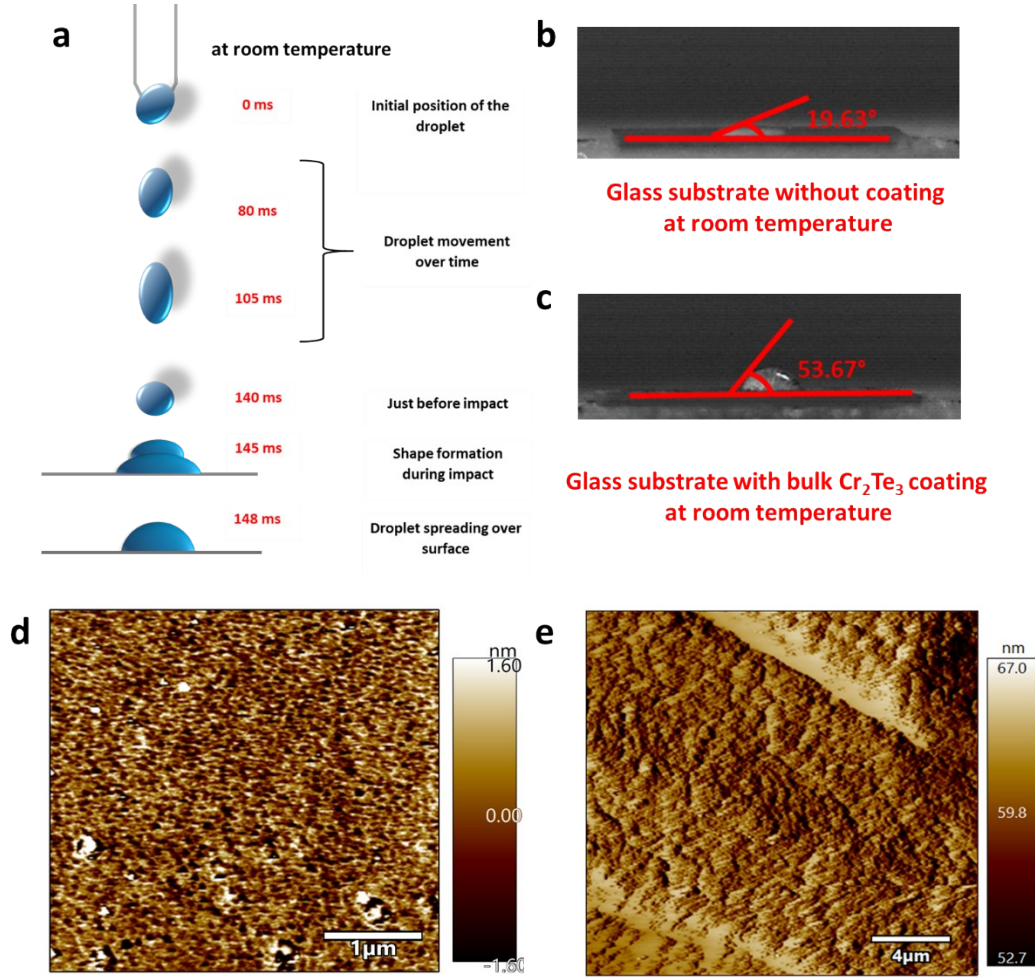

**Figure S10:** (a) Schematic representation of water drop falling on a surface, Contact angle measurement on (b) plane glass substrate and (c) bulk  $\text{Cr}_2\text{Te}_3$  coating, Surface morphology obtained by AFM (d) 2D  $\text{Cr}_2\text{Te}_3$  and (e) Bulk  $\text{Cr}_2\text{Te}_3$ .

### Surface Interaction studies:

We have considered two cases of ice attachment to chromium telluride (**Figure S11**). The formation energy  $E^{\text{form}}$  of the 1L- $\text{H}_2\text{O}/\text{Cr}_2\text{Te}_3$  structure was calculated as follows:

$$E^{\text{form}} = E^{\text{tot}}(1\text{L} - \text{H}_2\text{O}/\text{Cr}_2\text{Te}_3) - E^{\text{tot}}(1\text{L} - \text{H}_2\text{O}) - E^{\text{tot}}(1\text{L} - \text{Cr}_2\text{Te}_3) \quad (\text{S1})$$

where,  $E^{\text{tot}}(1\text{L-H}_2\text{O/Cr}_2\text{Te}_3)$ ,  $E^{\text{tot}}(1\text{L-H}_2\text{O})$  and  $E^{\text{tot}}(1\text{L-Cr}_2\text{Te}_3)$  are the total energies of 1L- $\text{H}_2\text{O/Cr}_2\text{Te}_3$  structure, ice crystal monolayer and 1L- $\text{Cr}_2\text{Te}_3$  monolayer, respectively. The obtained vdW gap values between the  $\text{Cr}_2\text{Te}_3$  and  $\text{H}_2\text{O}$  layers are 1.9 and 2.3 Å for the ferromagnetic and paramagnetic structure, respectively. The formation energies of different combinations are tabulated in **Table S1**.

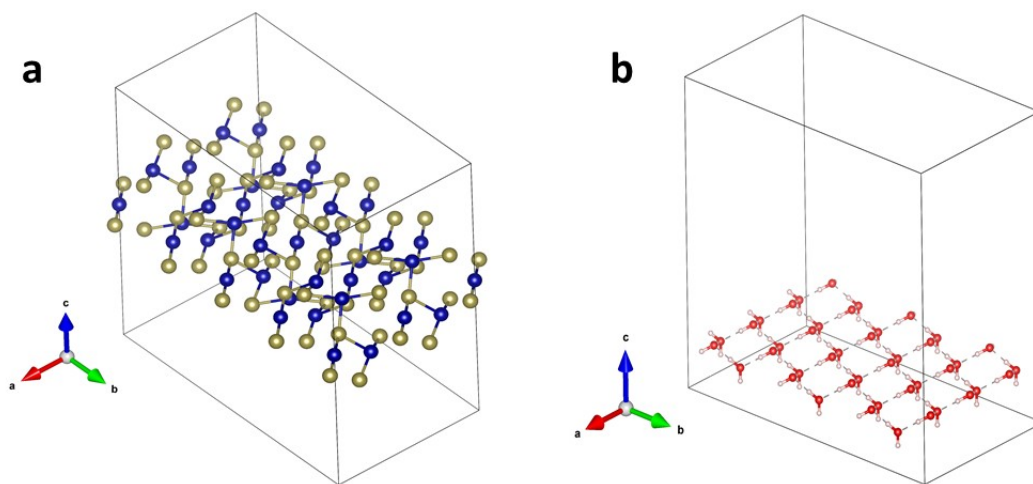

**Figure S11:** (a) 1L- $\text{Cr}_2\text{Te}_3$   $2 \times 2$  supercell and (b) 1L- $\text{H}_2\text{O}$   $3 \times 3$  supercell

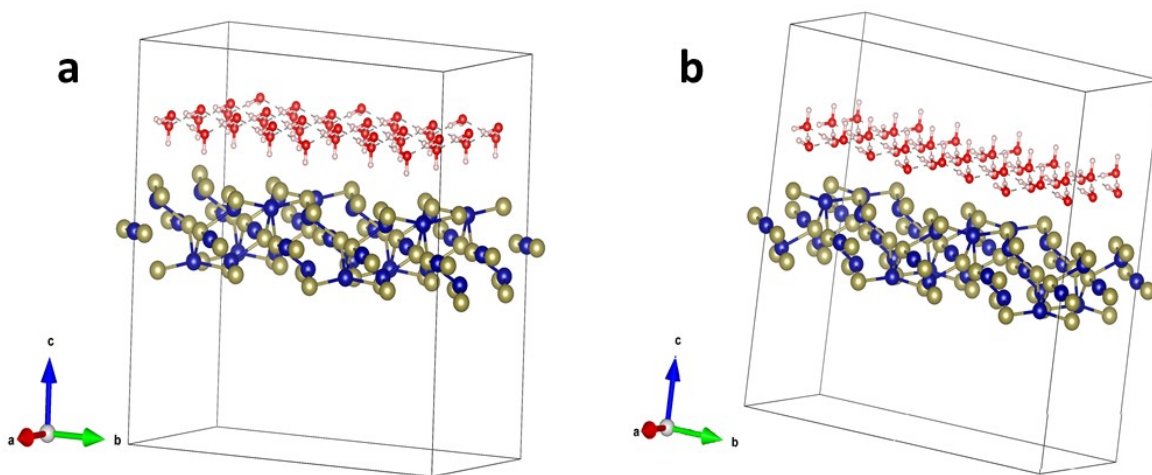

**Figure S12:** Two cases of ice attachment to chromium telluride. (a) Oxygen ions oriented towards the chromium telluride plane (O-oriented), (b) hydrogen ions oriented towards the chromium telluride plane (H-oriented).

**Table S1.** Structural parameters ( $\alpha = 90^\circ$ ,  $\beta = 90^\circ$ ) and calculated formation energy  $E^{form}$  for relaxed 1L- $H_2O/Cr_2Te_3$  heterostructures in four variants.

| Structure                                                     | a, b<br>(Å)        | $E^{form}$<br>(eV/ $H_2O$ ) |
|---------------------------------------------------------------|--------------------|-----------------------------|
| 1L- $H_2O/Cr_2Te_3$ FM<br>$Cr_2Te_3$ O-faced toward<br>$H_2O$ | a=12.72<br>b=23.49 | 0.242                       |
| 1L- $H_2O/Cr_2Te_3$ FM<br>$Cr_2Te_3$ H-faced toward<br>$H_2O$ | a=12.73<br>b=23.31 | 0.258                       |
| 1L- $H_2O/Cr_2Te_3$ PM<br>$Cr_2Te_3$ O-faced toward<br>$H_2O$ | a=12.57<br>b=23.29 | 0.390                       |
| 1L- $H_2O/Cr_2Te_3$ PM<br>$Cr_2Te_3$ H-faced toward<br>$H_2O$ | a=12.59<br>b=23.33 | 0.385                       |

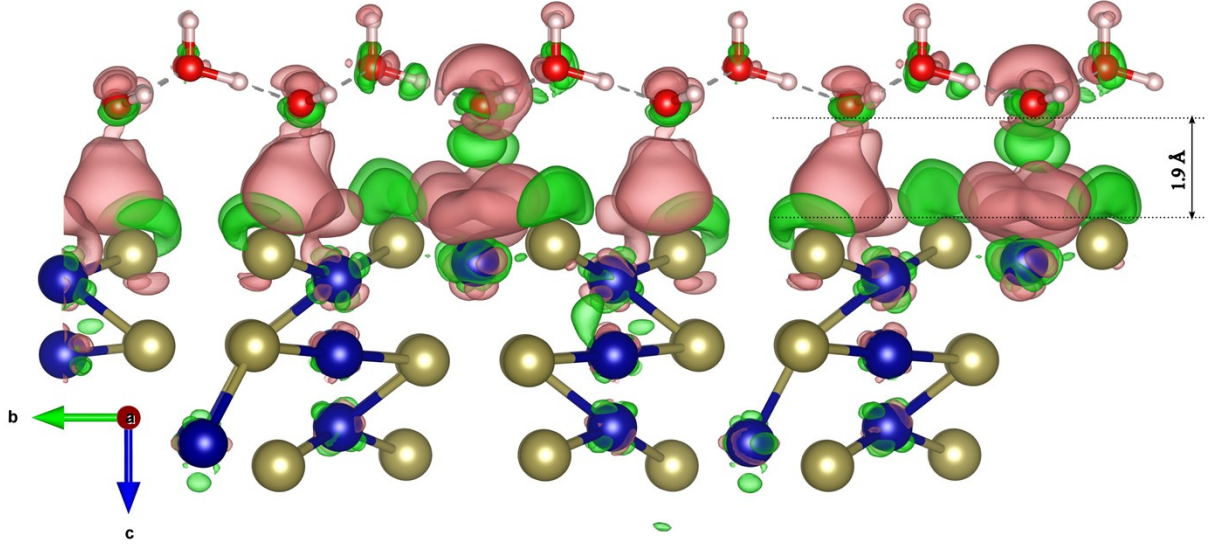

**Figure S13:** Charge transfer isosurface ( $3 \cdot 10^{-4} e/\text{\AA}$ ) between ice and ferromagnetic  $\text{Cr}_2\text{Te}_3$  monolayers. Red/green color correspond to the negative/positive charge difference. Dashed lines indicates the vdW gap between ice and substrate.

The charge transfer were computed using the following formalism:

$$\Delta\rho = \rho^{\text{Cr}_2\text{Te}_3/\text{H}_2\text{O}} - \rho^{\text{1Ltext-Cr}_2\text{Te}_3} - \rho^{\text{1Ltext-H}_2\text{O}} \quad (\text{S2})$$

where  $\rho^{\text{Cr}_2\text{Te}_3/\text{H}_2\text{O}}$  is the charge density for the ice/ $\text{Cr}_2\text{Te}_3$  total monolayered structure,  $\rho^{\text{1Ltext-Cr}_2\text{Te}_3}$  and  $\rho^{\text{1Ltext-H}_2\text{O}}$  are charge density for the bare  $\text{Cr}_2\text{Te}_3$  and bare  $\text{H}_2\text{O}$  monolayers, respectively. The charge transfer isosurface between ice and FM  $\text{Cr}_2\text{Te}_3$  ML was  $3 \times 10^{-4} e/\text{\AA}$ .

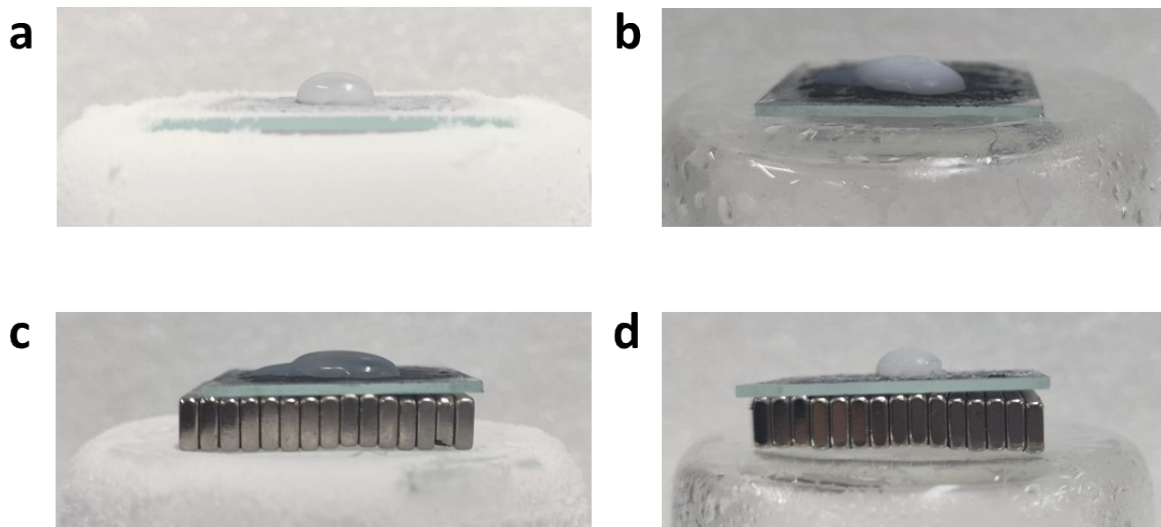

**Figure S14:** (a) Oil droplet on bare frozen surface (without magnetic field) at 0°C and (b) at Room temperature (> 25 °C), (c) Oil droplet on application of external magnetic field at 0°C and (d) at Room temperature (> 25 °C).
